# Supplementary material for: Extra cost of brain metastases (BM) in patients with non-squamous non-small cell lung cancer (NSCLC): a French national hospital database analysis
Source: PubMed Central journal article supplement — ESMO Open. 2018 Sep 8;3(6):e000414. doi: 10.1136/esmoopen-2018-000414 (PMC6135444; doi:10.1136/esmoopen-2018-000414), 2018-09-08
Supplement: esmoopen-2018-000414supp001.pdf [file esmoopen-2018-000414supp001.pdf]

## SUPPLEMENTARY MATERIAL

Supplementary Table 1. ICD-10 codes for lung cancer

| ICD-10 code | Wording                                        |
|-------------|------------------------------------------------|
| <b>C34*</b> | <b>Malignant neoplasm of bronchus and lung</b> |
| C34.0       | Main bronchus                                  |
| C34.1       | Upper lobe, bronchus or lung                   |
| C34.2       | Middle lobe, bronchus or lung                  |
| C34.3       | Lower lobe, bronchus or lung                   |
| C34.8       | Overlapping lesion of bronchus and lung        |
| C34.9       | Bronchus or lung, unspecified                  |

**Supplementary Table 2.** ICD-10 codes for metastatic cancer

| <b>ICD-10 code</b> | <b>Wording</b>                                                                   |
|--------------------|----------------------------------------------------------------------------------|
| <b>C77*</b>        | <b>Secondary and unspecified malignant neoplasm of lymph nodes</b>               |
| C77.0              | Lymph nodes of head, face and neck                                               |
| C77.1              | Intrathoracic lymph nodes                                                        |
| C77.2              | Intra-abdominal lymph nodes                                                      |
| C77.3              | Axillary and upper limb lymph nodes                                              |
| C77.4              | Inguinal and lower limb lymph nodes                                              |
| C77.5              | Intrapelvic lymph nodes                                                          |
| C77.8              | Lymph nodes of multiple regions                                                  |
| C77.9              | Lymph node, unspecified                                                          |
| <b>C78*</b>        | <b>Secondary malignant neoplasm of respiratory and digestive organs</b>          |
| C78.0              | Secondary malignant neoplasm of lung                                             |
| C78.1              | Secondary malignant neoplasm of mediastinum                                      |
| C78.2              | Secondary malignant neoplasm of pleura                                           |
| C78.3              | Secondary malignant neoplasm of other and unspecified respiratory organs         |
| C78.4              | Secondary malignant neoplasm of small intestine                                  |
| C78.5              | Secondary malignant neoplasm of large intestine and rectum                       |
| C78.6              | Secondary malignant neoplasm of retroperitoneum and peritoneum                   |
| C78.7              | Secondary malignant neoplasm of liver and intrahepatic bile duct                 |
| C78.8              | Secondary malignant neoplasm of other and unspecified digestive organs           |
| <b>C79*</b>        | <b>Secondary malignant neoplasm of other and unspecified sites</b>               |
| C79.0              | Secondary malignant neoplasm of kidney and renal pelvis                          |
| C79.1              | Secondary malignant neoplasm of bladder and other and unspecified urinary organs |
| C79.2              | Secondary malignant neoplasm of skin                                             |
| C79.3              | Secondary malignant neoplasm of brain and cerebral meninges                      |
| C79.4              | Secondary malignant neoplasm of other and unspecified parts of nervous system    |
| C79.5              | Secondary malignant neoplasm of bone and bone marrow                             |
| C79.6              | Secondary malignant neoplasm of ovary                                            |
| C79.7              | Secondary malignant neoplasm of adrenal gland                                    |

| ICD-10 code | Wording                                               |
|-------------|-------------------------------------------------------|
| C79.8       | Secondary malignant neoplasm of other specified sites |
| C79.9       | Secondary malignant neoplasm, unspecified site        |

**Supplementary Table 3.** Number of deaths per month of follow-up following the index hospitalization in 2013.

| Month | Group A (no BM) |            |              | Group B (with BM) |            |              |
|-------|-----------------|------------|--------------|-------------------|------------|--------------|
|       | n               | % interval | % cumulative | n                 | % interval | % cumulative |
| 1     | 34              | 3.6%       | 3.6%         | 6                 | 0.9%       | 0.9%         |
| 2     | 70              | 7.4%       | 11.0%        | 36                | 5.2%       | 6.0%         |
| 3     | 92              | 9.8%       | 20.8%        | 43                | 6.2%       | 12.2%        |
| 4     | 71              | 7.5%       | 28.3%        | 51                | 7.3%       | 19.6%        |
| 5     | 85              | 9.0%       | 37.4%        | 46                | 6.6%       | 26.2%        |
| 6     | 71              | 7.5%       | 44.9%        | 57                | 8.2%       | 34.4%        |
| 7     | 62              | 6.6%       | 51.5%        | 45                | 6.5%       | 40.9%        |
| 8     | 51              | 5.4%       | 56.9%        | 54                | 7.8%       | 48.6%        |
| 9     | 53              | 5.6%       | 62.5%        | 38                | 5.5%       | 54.1%        |
| 10    | 51              | 5.4%       | 67.9%        | 37                | 5.3%       | 59.4%        |
| 11    | 39              | 4.1%       | 72.1%        | 32                | 4.6%       | 64.0%        |
| 12    | 30              | 3.2%       | 75.3%        | 31                | 4.5%       | 68.5%        |
| 13    | 32              | 3.4%       | 78.7%        | 27                | 3.9%       | 72.4%        |
| 14    | 22              | 2.3%       | 81.0%        | 24                | 3.5%       | 75.8%        |
| 15    | 24              | 2.5%       | 83.5%        | 24                | 3.5%       | 79.3%        |
| 16    | 28              | 3.0%       | 86.5%        | 26                | 3.7%       | 83.0%        |
| 17    | 30              | 3.2%       | 89.7%        | 18                | 2.6%       | 85.6%        |
| 18    | 19              | 2.0%       | 91.7%        | 21                | 3.0%       | 88.6%        |
| 19    | 15              | 1.6%       | 93.3%        | 15                | 2.2%       | 90.8%        |
| 20    | 9               | 1.0%       | 94.3%        | 19                | 2.7%       | 93.5%        |
| 21    | 13              | 1.4%       | 95.6%        | 11                | 1.6%       | 95.1%        |
| 22    | 15              | 1.6%       | 97.2%        | 14                | 2.0%       | 97.1%        |
| 23    | 18              | 1.9%       | 99.2%        | 7                 | 1.0%       | 98.1%        |

|              |     |      |        |     |      |        |
|--------------|-----|------|--------|-----|------|--------|
| 24           | 8   | 0.8% | 100.0% | 13  | 1.9% | 100.0% |
| <b>TOTAL</b> | 942 |      |        | 695 |      |        |
